# Supplementary material
Source: MDPI journal article supplement (https://www.mdpi.com/2073-445X/5/2/15)
Supplement: s1 [file s1]

**Sustainable Management of Maguri-  
Motapong wetland complex, Tinsukiya  
district, Assam, India**

Himalayan Climate Change and Adaptation Program (HICAP)/ICIMOD

Household code:  
Address: ..... District .....Block  
..... Village Date of  
interview:

PART I: Personal Information

1. Individual

1.1. Age: ..... Yrs.

1.2. Gender: (a) Male (b) Female

1.3. Family Size: (i) Over 18 years old ..... (ii) Under 18 years old.....

1.4. Ethnicity:

1.5. Education: ..... Years

1.6. Occupation (main income source first): (i) ..... (ii)..... (iii).....

1.7. Name of the other wetlands from where you mostly use products/services:

1.8. Living in this area : (a) Born here (b)..... years

1.9. Landholding and Tenure :

| Land characteristics | Land type and Area (Kathha) |                |                 | No. of crops per year | Name of crops |
|----------------------|-----------------------------|----------------|-----------------|-----------------------|---------------|
|                      | Own land                    | Shared crop in | Shared crop out |                       |               |
| Irrigated            |                             |                |                 |                       |               |
| Unirrigated          |                             |                |                 |                       |               |
| Forest               |                             |                |                 |                       |               |
| Others               |                             |                |                 |                       |               |

1.10. How long your production can meet your household food demand?

(a) <3 months (b) 3 to 6 months (c) 6 to 9 months (d) 9 to 12 months (e) >12 months

1.11. Indicate whether your household possesses the following items and how many

|         |  |            |  |       |  |       |  |        |  |                     |  |       |  |
|---------|--|------------|--|-------|--|-------|--|--------|--|---------------------|--|-------|--|
| Car     |  | Motorbike  |  | Bus   |  | Truck |  | Solar  |  | Cooking gas         |  | ..... |  |
| Tractor |  | Television |  | Cycle |  | Radio |  | Biogas |  | Improved cook stove |  | ..... |  |

1.11.1. Mention the type of improved cook stove: (a) Mud (b) Metal (c) Others .....

1.12. Major crops, and quantity produced and sold in the last year

| Crops     | Unit | Total production | Unit sold | Unit price (Rs) | Income from selling (Rs) |
|-----------|------|------------------|-----------|-----------------|--------------------------|
| Rice      |      |                  |           |                 |                          |
| Maize     |      |                  |           |                 |                          |
| Wheat     |      |                  |           |                 |                          |
| Potato    |      |                  |           |                 |                          |
| Vegetable |      |                  |           |                 |                          |
| Fruits    |      |                  |           |                 |                          |
| Others    |      |                  |           |                 |                          |

1.13. Livestock (number)

(a) Buffalo ..... (b) Cow..... (c) Ox ..... (d) Goat..... (e) Others .....

1.14. Income from livestock products

| Product             | Unit | Total Production | Unit sold | Unit price (Rs) | Total income (Rs) |
|---------------------|------|------------------|-----------|-----------------|-------------------|
| Milk                |      |                  |           |                 |                   |
| Meat                |      |                  |           |                 |                   |
| Egg                 |      |                  |           |                 |                   |
| Other milk products |      |                  |           |                 |                   |
| Others              |      |                  |           |                 |                   |

PART II: State of wetland complex

We are interested in your opinions about the management of Maguri-Motapong wetland complex. We are interested in only your household’s use of the wetland resources, not use by other households in your village or other villages.

1. Ecosystem services – driver of change and trend (compared to last 10 years)

| Items                                                   | Trend <sup>1</sup> | Reasons for change (drivers) | Impact on livelihood <sup>2</sup> |
|---------------------------------------------------------|--------------------|------------------------------|-----------------------------------|
| Fish                                                    |                    |                              |                                   |
| Drinking water                                          |                    |                              |                                   |
| Irrigation water                                        |                    |                              |                                   |
| Fuelwood                                                |                    |                              |                                   |
| Fodder , leaf litter                                    |                    |                              |                                   |
| Edible plants (fruits, vegetables)                      |                    |                              |                                   |
| Meat, (wild life if considered for consumption)         |                    |                              |                                   |
| Medicinal and aromatic plants                           |                    |                              |                                   |
| Other construction materials (thatch, bamboo, rattan,)  |                    |                              |                                   |
| Any other products, ...                                 |                    |                              |                                   |
| Tourism (bird watching)                                 |                    |                              |                                   |
| Flood control                                           |                    |                              |                                   |
| Religious, cultural importance if any                   |                    |                              |                                   |
| Any other services (please use separate page if needed) |                    |                              |                                   |

<sup>1</sup>Trend— Decreasing =1, No-change =2, Increasing = 3

<sup>2</sup>Impact — Negative =1, No-impact =2, Positive = 3

2. Wetland Condition

- a. Has there any change in wetland condition (in terms of area, water level)? a) yes    b) No
- b. Has there been any change in the wetland biodiversity (fish, bird species)? (a) Yes                      (b) No
- c. Major wetland products collection and use

| Wetland products       | Unit | Frequency<br>(Weekly/Monthly/<br>Yearly) | Collected quantity<br>(2012) | Price per unit (IRs) | Collected quantity (10<br>yrs back) | Price per unit (IRs) |
|------------------------|------|------------------------------------------|------------------------------|----------------------|-------------------------------------|----------------------|
| Fish                   |      |                                          |                              |                      |                                     |                      |
| Fuelwood               |      |                                          |                              |                      |                                     |                      |
| Fodder ,<br>leaflitter |      |                                          |                              |                      |                                     |                      |
| Vegetabl<br>e          |      |                                          |                              |                      |                                     |                      |
| Edible<br>fruits       |      |                                          |                              |                      |                                     |                      |
| Thatch,<br>rope etc    |      |                                          |                              |                      |                                     |                      |
| Grazing,<br>fodder     |      |                                          |                              |                      |                                     |                      |
| Any<br>others....      |      |                                          |                              |                      |                                     |                      |

- d. In your opinion, are there any plant species disappeared in your wetland (those which were available earlier 20 yrs back, but not seen in recent years)? a) Yes                      b) no  
If yes, please list them 1)                                              2)                                              3)
- e. In your opinion, are there any animal species (including birds, fish) disappeared in your wetland (those which were available earlier 20 yrs back, but not seen in recent years)? a) Yes                      b) no  
If yes, please list them 1)                                              2)                                              3)
- f. In your opinion, are there any new plant species seen in you forest (those which were not seen earlier 20 yrs back, but not seen in recent years)? a) Yes                      b) no  
If yes, please list them 1)                                              2)                                              3)
- g. In your opinion, are there any new animal species (including birds, fish) seen in you forest (those which were not seen earlier 20 yrs back, but not seen in recent years)? a) Yes                      b) no  
If yes, please list them 1)                                              2)                                              3)
- h. In your opinion, what are the most important three fish species of the wetland ? Write in preference order?  
(a)                                              (b)                                              (c)                                              (d)                                              (e)
- i. If wetland products availability is decreasing, how do you compensate for the reduction in wetland products?  
(a) Reducing consumption    (b) privately producing    (c) Buying                      (e) others .....

3. **Driver of Ecosystem Change/Threat analysis**

In your opinion, what are the major reasons (drivers) of change in Poba reserve forests? Kindly suggest in priority order

| Drivers                                                 | Perception on change (prioritised drivers) |           |             |          |                  | Remarks |
|---------------------------------------------------------|--------------------------------------------|-----------|-------------|----------|------------------|---------|
|                                                         | Very high<br>(-2)                          | High (-1) | Neutral (0) | Low (+1) | Very low<br>(+2) |         |
| Siltation                                               |                                            |           |             |          |                  |         |
| River cutting                                           |                                            |           |             |          |                  |         |
| Deforestation                                           |                                            |           |             |          |                  |         |
| Over exploitation of resources                          |                                            |           |             |          |                  |         |
| Sewage, and other pollution                             |                                            |           |             |          |                  |         |
| Invasive and alien species                              |                                            |           |             |          |                  |         |
| Erosion, landslide                                      |                                            |           |             |          |                  |         |
| Chemical , poisoning                                    |                                            |           |             |          |                  |         |
| Any others... please list (use another paper if needed) |                                            |           |             |          |                  |         |

4. **What are major natural calamities in your area?**

| Calamities | Frequency of occurrence<br>(times/year) | Damage to your household/<br>property * | Damage to wetland* | Way to control |
|------------|-----------------------------------------|-----------------------------------------|--------------------|----------------|
| Landslides |                                         |                                         |                    |                |
| Flooding   |                                         |                                         |                    |                |
| Draught    |                                         |                                         |                    |                |
|            |                                         |                                         |                    |                |

\* Mention – Land (Irrigated, Unirrigated, Others) in Ropani, Livestock Number, Other property (monetary value), if production has decreased compared with the past year.

### **PART III: Wetland Management**

6. Are there any institutional set up or management modality available to manage your wetland complex Poba forests? For example, community management groups, management plan.?

a) Yes      b) No

If Yes... what are those mechanism – please elaborate

If no—do you support to establish institutional set up to manage Maguri wetland ?

7. Do you see the need of any management plan for Maguri complex

a) Yes      b) no

8. Is there any external support available to manage Maguri-Motapong wetland complex

a) Yes      b) No

If yes, please elaborate

9. In your opinion, what is the legal status of Maguri Potapong wetland

a) Under Department of forest   b) under local government   c) under community (tribal rights) d) I do not know e) other

Thank you!!!
